# Supplementary material
Source: PubMed Central journal article supplement (PMC4388126)
Supplement: chest_147_4_959_ds01.pdf [file chest_147_4_959_ds01.pdf]

# Trends in Mechanical Ventilation Among Patients Hospitalized With Acute Exacerbations of COPD in the United States, 2001 to 2011

Mihaela S. Stefan, MD; Meng-Shiou Shieh, PhD; Penelope S. Pekow, PhD; Nicholas Hill, MD, FCCP; Michael B. Rothberg, MD, MPH; and Peter K. Lindenauer, MD

CHEST 2015; 147(4):959-968

**e-Figure 1.**

## A: Trends of ventilation use in COPD by age groups, 2001-2011

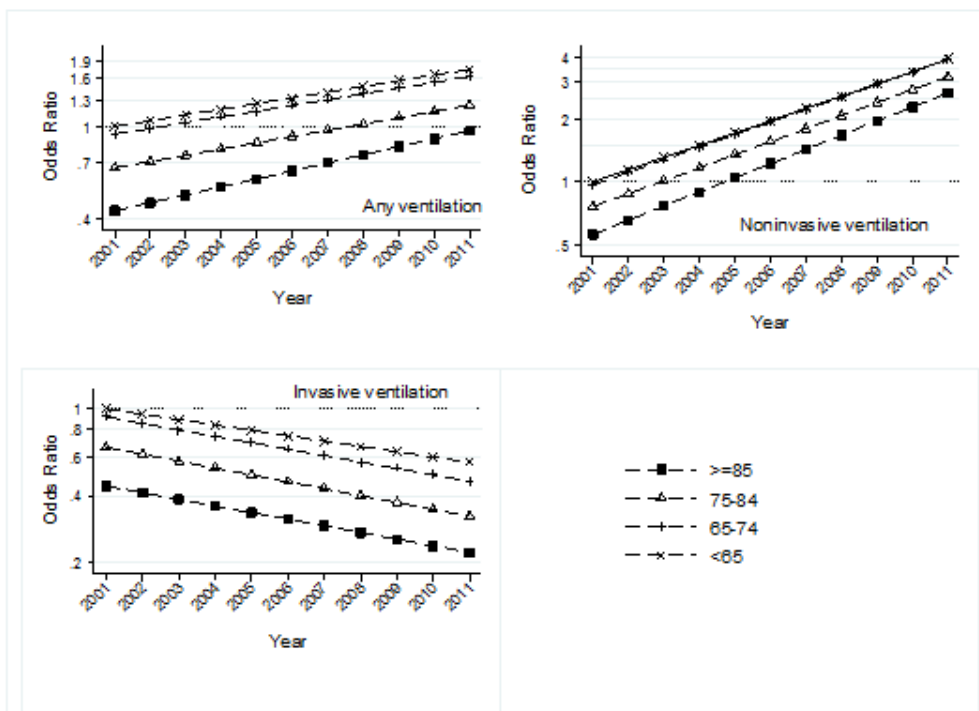

ORs plotted are relative to referent group, admissions of patients <65, in 2001

Online supplements are not copyedited prior to posting.

**e-Figure 2.**

**B: Trends of ventilation use in COPD by race groups, 2001-2011 .**

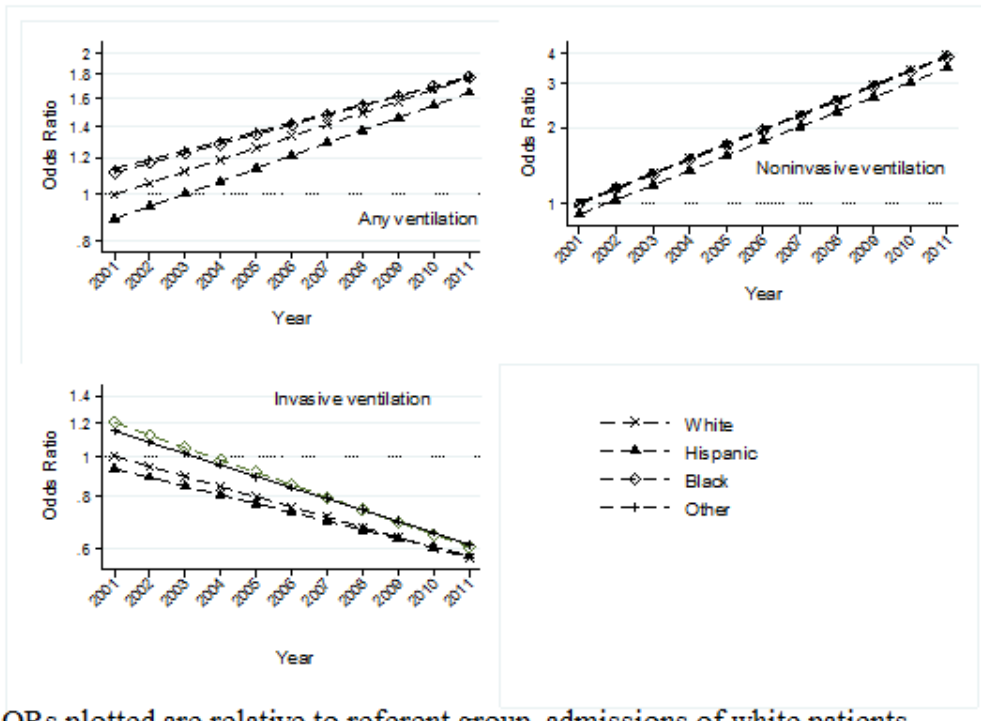

ORs plotted are relative to referent group, admissions of white patients, in 2001

*Online supplements are not copyedited prior to posting.*

**e-Figure 3.**

**C: Trends of ventilation use in COPD by comorbidity score, 2001-2011**

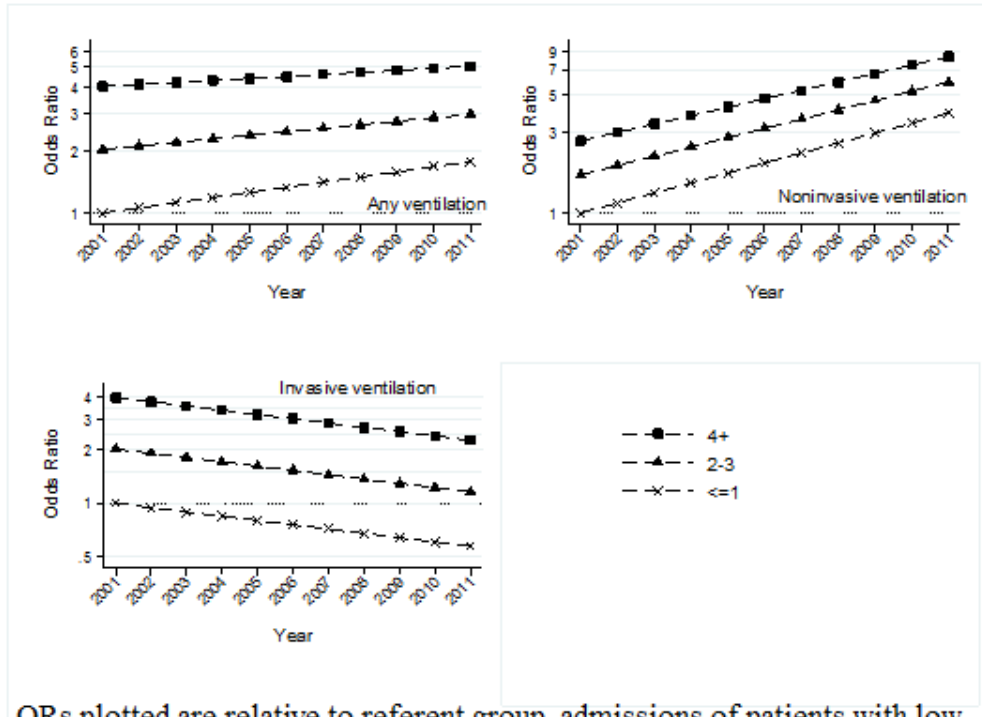

ORs plotted are relative to referent group, admissions of patients with low comorbidity score, in 2001

*Online supplements are not copyedited prior to posting.*

**e-Figure 4.**

**D: Trends of ventilation use in COPD by prior number of COPD admissions, 2001-2011**

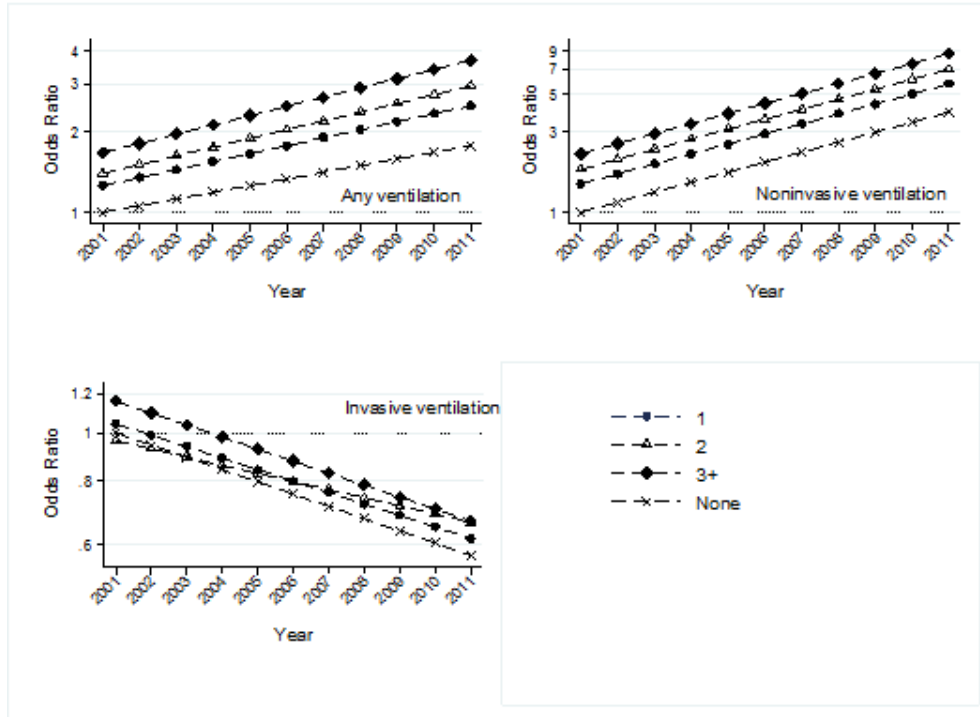

ORs plotted are relative to referent group, admissions of patients without prior hospitalization for COPD, in 2001

*Online supplements are not copyedited prior to posting.*

**e-Table 1: Patient Characteristics and Ventilation Management Over Time**

| CHARACTERISTIC or VENTILATION MANAGEMENT |                  | YEAR     |          |          |          |          |          |          |          |          |          |          |
|------------------------------------------|------------------|----------|----------|----------|----------|----------|----------|----------|----------|----------|----------|----------|
|                                          |                  | 2001     | 2002     | 2003     | 2004     | 2005     | 2006     | 2007     | 2008     | 2009     | 2010     | 2011     |
| Total COPD Admissions                    |                  | 43,421   | 51,173   | 59,249   | 56,689   | 64,295   | 71,057   | 73,016   | 86,039   | 86,345   | 83,161   | 49,115   |
| Gender                                   | Female           | 58.20%   | 58.20%   | 59.10%   | 59.40%   | 59.80%   | 59.70%   | 59.80%   | 59.70%   | 60.20%   | 60.30%   | 60.30%   |
|                                          | Male             | 41.80%   | 41.80%   | 40.90%   | 40.60%   | 40.20%   | 40.30%   | 40.20%   | 40.30%   | 39.80%   | 39.70%   | 39.70%   |
| Age (years)                              | Median, IQR      | 71,62-78 | 71,61-78 | 71,61-78 | 71,61-78 | 71,62-79 | 71,61-79 | 71,61-79 | 71,61-79 | 70,60-79 | 70,60-79 | 70,61-79 |
|                                          | <65              | 32.00%   | 32.60%   | 32.90%   | 32.50%   | 32.60%   | 33.10%   | 33.20%   | 33.10%   | 35.30%   | 35.10%   | 34.30%   |
|                                          | 65-74            | 32.00%   | 31.00%   | 30.20%   | 29.80%   | 29.20%   | 28.50%   | 28.60%   | 28.10%   | 28.50%   | 28.40%   | 28.70%   |
|                                          | 75-84            | 27.90%   | 28.40%   | 28.50%   | 28.60%   | 28.60%   | 28.40%   | 27.90%   | 27.60%   | 25.60%   | 25.30%   | 25.60%   |
|                                          | ≥85              | 8.10%    | 8.00%    | 8.40%    | 9.00%    | 9.60%    | 10.10%   | 10.30%   | 11.20%   | 10.60%   | 11.20%   | 11.50%   |
| Race/Ethnicity                           | White            | 76.70%   | 73.20%   | 74.00%   | 73.20%   | 72.80%   | 71.50%   | 70.90%   | 70.80%   | 70.60%   | 71.80%   | 75.80%   |
|                                          | Black            | 7.60%    | 8.80%    | 9.60%    | 10.50%   | 10.30%   | 10.50%   | 10.80%   | 10.60%   | 11.00%   | 10.50%   | 10.30%   |
|                                          | Hispanic         | 2.20%    | 3.80%    | 4.60%    | 3.20%    | 3.40%    | 3.50%    | 3.60%    | 4.10%    | 4.20%    | 3.80%    | 2.20%    |
|                                          | Other            | 13.60%   | 14.20%   | 11.90%   | 13.10%   | 13.60%   | 14.40%   | 14.80%   | 14.60%   | 14.20%   | 13.90%   | 11.70%   |
| Combined Comorbidity Score               | Median, IQR      | 2,1-3    | 2,1-3    | 2,1-3    | 2,1-3    | 2,1-3    | 2,1-3    | 2,1-4    | 2,1-4    | 2,1-4    | 2,1-4    | 2,1-4    |
|                                          | Low (≤1)         | 48.40%   | 47.80%   | 47.70%   | 46.40%   | 45.60%   | 43.10%   | 41.80%   | 40.50%   | 40.40%   | 39.50%   | 39.50%   |
|                                          | Median (2-3)     | 33.70%   | 33.00%   | 33.30%   | 33.10%   | 32.70%   | 32.20%   | 31.90%   | 32.00%   | 31.60%   | 31.50%   | 31.70%   |
|                                          | High (≥4)        | 17.90%   | 19.20%   | 19.00%   | 20.50%   | 21.70%   | 24.80%   | 26.30%   | 27.40%   | 28.00%   | 29.00%   | 28.90%   |
| History of Concomitant Pneumonia         |                  | 9.20%    | 10.50%   | 12.90%   | 13.90%   | 15.30%   | 15.60%   | 17.50%   | 23.50%   | 22.80%   | 21.90%   | 23.80%   |
| Number of COPD Admissions in Prior Year  | None             | 70.50%   | 70.40%   | 70.50%   | 68.40%   | 69.70%   | 69.50%   | 68.00%   | 68.20%   | 66.80%   | 66.70%   | 70.00%   |
|                                          | 1                | 16.80%   | 17.00%   | 16.80%   | 17.60%   | 17.00%   | 16.90%   | 17.40%   | 17.60%   | 17.80%   | 17.80%   | 17.00%   |
|                                          | 2                | 6.40%    | 6.40%    | 6.60%    | 6.80%    | 6.60%    | 6.60%    | 6.90%    | 6.80%    | 7.20%    | 7.20%    | 6.30%    |
|                                          | ≥3               | 6.20%    | 6.20%    | 6.20%    | 7.20%    | 6.70%    | 6.90%    | 7.70%    | 7.50%    | 8.10%    | 8.30%    | 6.80%    |
| <b>Hospital Characteristics</b>          |                  |          |          |          |          |          |          |          |          |          |          |          |
| Bed Size                                 | Small (<200)     | 18.30%   | 19.20%   | 18.70%   | 16.00%   | 17.70%   | 17.30%   | 17.90%   | 18.80%   | 19.90%   | 20.30%   | 23.40%   |
|                                          | Medium (200-400) | 41.50%   | 42.30%   | 41.50%   | 41.80%   | 41.30%   | 41.30%   | 40.80%   | 41.30%   | 42.00%   | 42.20%   | 41.90%   |
|                                          | Large (>400)     | 40.20%   | 38.50%   | 39.90%   | 42.20%   | 40.90%   | 41.40%   | 41.30%   | 39.90%   | 38.00%   | 37.60%   | 34.70%   |
| Region                                   | Midwest          | 20.90%   | 20.60%   | 17.80%   | 19.20%   | 20.50%   | 20.20%   | 20.20%   | 20.40%   | 19.70%   | 19.70%   | 20.20%   |
|                                          | Northeast        | 9.30%    | 10.10%   | 17.30%   | 19.80%   | 20.40%   | 19.70%   | 19.90%   | 20.40%   | 19.70%   | 19.00%   | 17.90%   |
|                                          | South            | 57.90%   | 57.30%   | 55.20%   | 51.30%   | 48.80%   | 46.30%   | 45.80%   | 45.70%   | 45.80%   | 46.70%   | 48.00%   |
|                                          | West             | 11.80%   | 12.00%   | 9.80%    | 9.70%    | 10.30%   | 13.80%   | 14.10%   | 13.40%   | 14.70%   | 14.60%   | 13.90%   |

*Online supplements are not copyedited prior to posting.*



|                       |                 |        |        |        |        |        |        |        |        |        |        |        |
|-----------------------|-----------------|--------|--------|--------|--------|--------|--------|--------|--------|--------|--------|--------|
| Population Served     | Rural           | 21.90% | 19.60% | 17.50% | 15.00% | 15.80% | 15.30% | 14.60% | 14.90% | 15.00% | 16.30% | 18.40% |
|                       | Urban           | 78.10% | 80.40% | 82.50% | 85.00% | 84.20% | 84.70% | 85.40% | 85.10% | 85.00% | 83.70% | 81.60% |
| Teaching Hospital     |                 | 29.60% | 30.30% | 32.40% | 33.90% | 32.70% | 31.90% | 30.80% | 31.20% | 32.00% | 32.00% | 31.60% |
| Nature of Ventilation | No Ventilation  | 86.47% | 85.30% | 84.69% | 83.12% | 82.65% | 81.35% | 80.72% | 81.09% | 81.00% | 80.04% | 79.98% |
|                       | NIV Initially   | 5.46%  | 6.27%  | 7.26%  | 8.59%  | 9.52%  | 10.73% | 11.75% | 12.13% | 12.48% | 13.86% | 14.21% |
|                       | IMV Initially   | 8.07%  | 8.44%  | 8.06%  | 8.29%  | 7.83%  | 7.92%  | 7.52%  | 6.78%  | 6.52%  | 6.11%  | 5.80%  |
|                       | Any Ventilation | 13.53% | 14.70% | 15.31% | 16.88% | 17.35% | 18.65% | 19.28% | 18.91% | 19.00% | 19.96% | 20.02% |
| Death                 |                 | 3.90%  | 3.90%  | 3.50%  | 3.50%  | 3.10%  | 3.10%  | 2.80%  | 2.60%  | 2.20%  | 2.00%  | 2.20%  |

*Online supplements are not copyedited prior to posting.*
